# Supplementary material
Source: PubMed Central journal article supplement (PMC7653584)
Supplement: ajtr0012-6811-f8.pdf [file ajtr0012-6811-f8.pdf]

# miRNAs in exosomes promote EMT

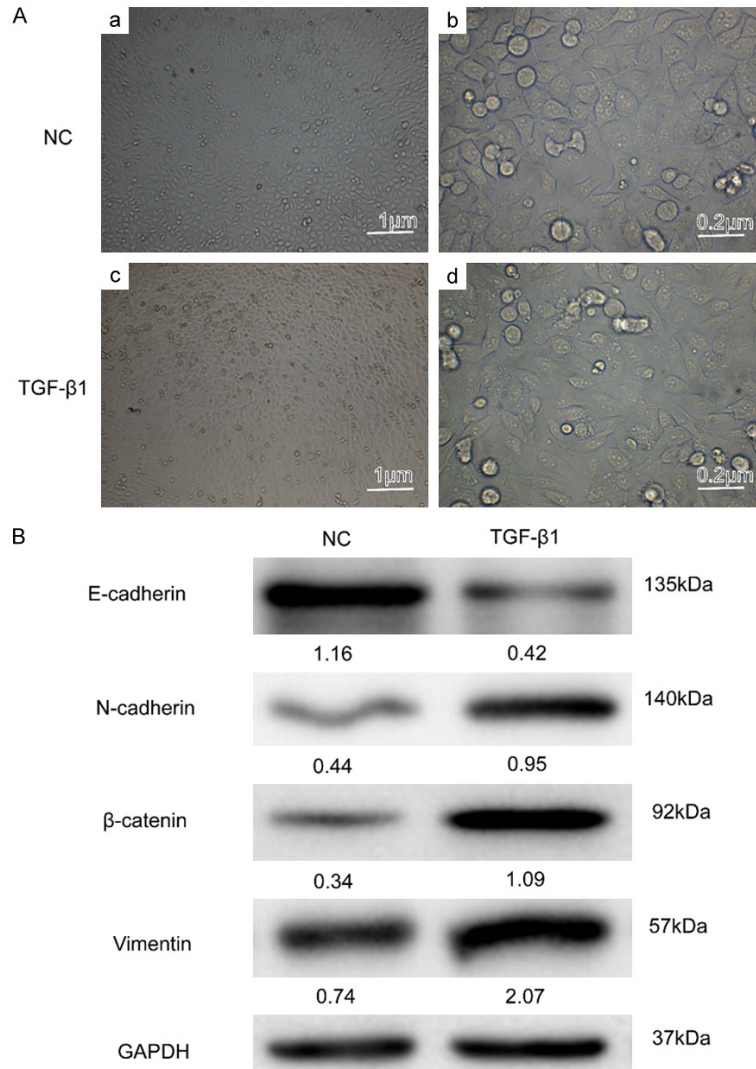

**Figure S1.** Cell morphology and exosome identification of SMMC-7721 cells with or without TGF- $\beta$ 1 treatment. Aa. SMMC-7721 cells without TGF- $\beta$ 1 treatment (magnified 40  $\times$ ). Ab. SMMC-7721 cells without TGF- $\beta$ 1 treatment (magnified 200  $\times$ ). Ac. SMMC-7721 cells treated with TGF- $\beta$ 1 (magnified 40  $\times$ ). Ad. SMMC-7721 cells treated with TGF- $\beta$ 1 (magnified 200  $\times$ ). B. WB analysis of EMT biomarkers in SMMC-7721 cells with or without TGF- $\beta$ 1 treatment. GAPDH was used as an internal reference.

miRNAs in exosomes promote EMT

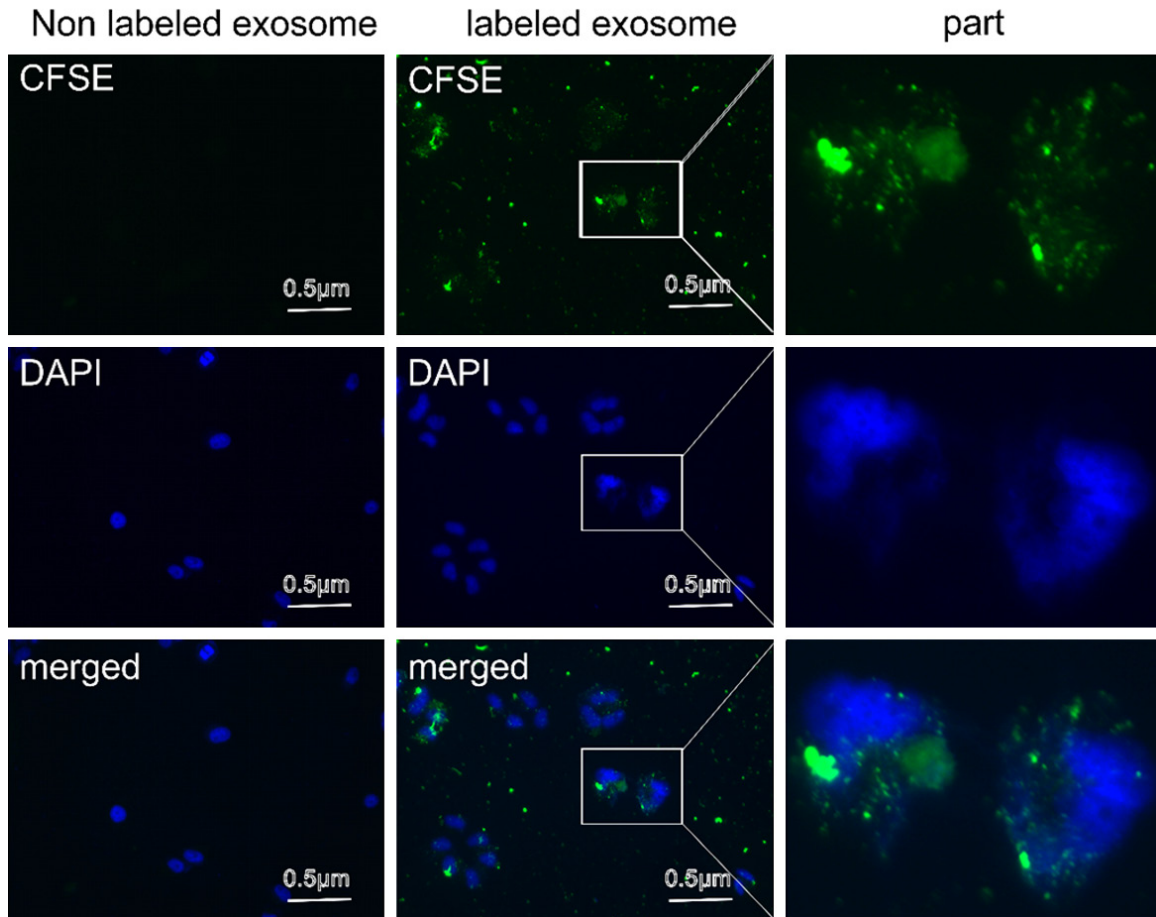

**Figure S2.** Endocytosis analysis of SMMC-7721 cells to exosomes of EMT SMMC-7721 cells. The exosomes of EMT SMMC-7721 cells were labeled with PKH67.

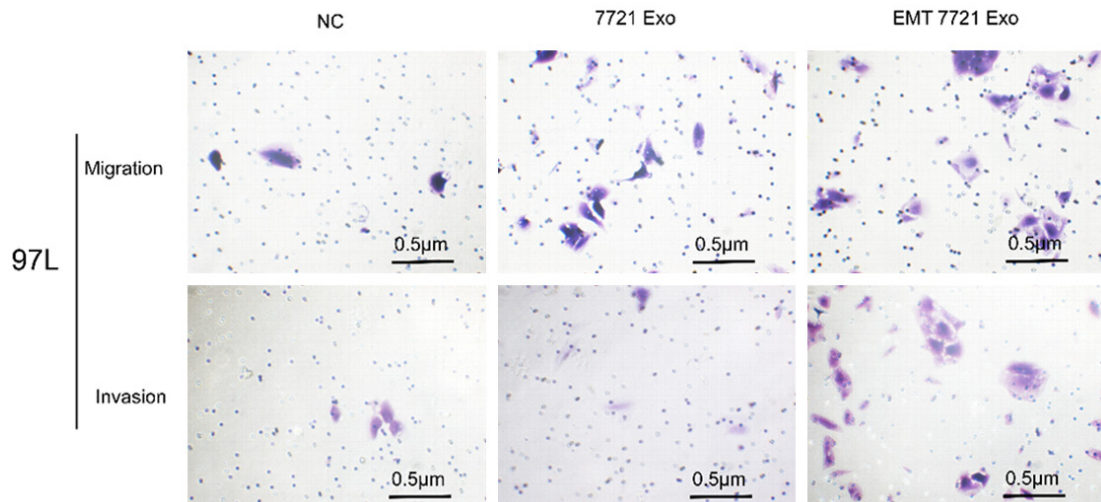

# miRNAs in exosomes promote EMT

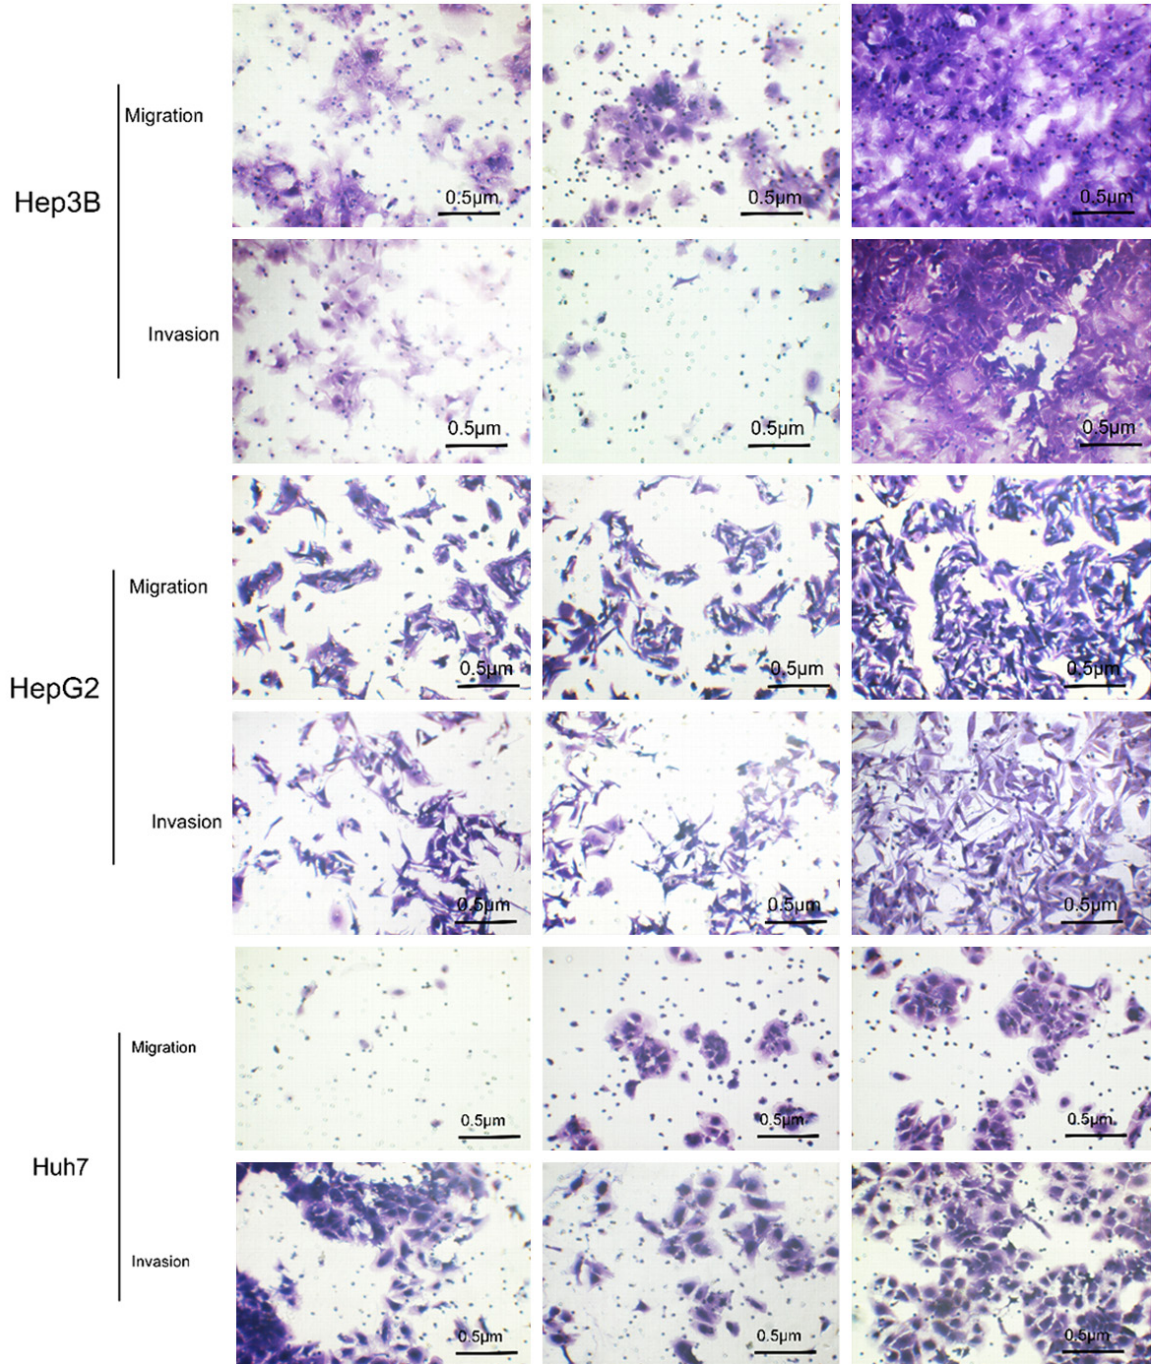

**Figure S3.** Migration and invasion analysis of the effects of exosomes of SMMC-7721 and EMT SMMC-7721 cells on four cell lines (97L, Hep3B, HepG2, and Huh7). All figures are magnified 200 ×. NC represents SMMC-7721 cells, 7721 Exo represents exosomes of SMMC-7721 cells, and EMT 7721 Exo represents exosomes of EMT SMMC-7721 cells.
